# Supplementary material for: Intramolecular hydroamination reactions catalyzed by zirconium complexes bearing bridged bis(phenolato) ligands
Source: Royal Society of Chemistry journal article supplement (doi:10.1039/c5ra23270h), 2016-01-01
Supplement: c5ra23270h1.pdf [file c5ra23270h1.pdf]

# Supporting Information

## **Intramolecular hydroamination reactions catalyzed by zirconium complexes bearing bridged bis(phenolato) ligands**

**Yu Zhang, Qiu Sun, Yaorong Wang, Dan Yuan\*, Yingming Yao\* and Qi Shen**

†Key Laboratory of Organic Synthesis of Jiangsu Province, College of Chemistry, Chemical Engineering and Materials Science, Dushu Lake Campus, Soochow University, Suzhou 215123, People's Republic of China

\*To whom correspondence should be addressed. Email: [yuandan@suda.edu.cn](mailto:yuandan@suda.edu.cn); [yaoym@suda.edu.cn](mailto:yaoym@suda.edu.cn)

### **Content**

|                                                                                         |     |
|-----------------------------------------------------------------------------------------|-----|
| <sup>1</sup> H and <sup>13</sup> C NMR spectra of complexes <b>1</b> and <b>2</b> ..... | S2  |
| <sup>1</sup> H NMR and <sup>13</sup> C NMR spectra of products.....                     | S4  |
| <sup>1</sup> H NMR monitoring of reactions.....                                         | S13 |
| <sup>1</sup> H NMR and <sup>13</sup> C NMR spectra of complex <b>1</b> + TB.....        | S17 |
| Crystallographic data for complexes <b>1</b> and <b>2</b> .....                         | S18 |

# $^1\text{H}$ and $^{13}\text{C}$ NMR spectra of complex 1

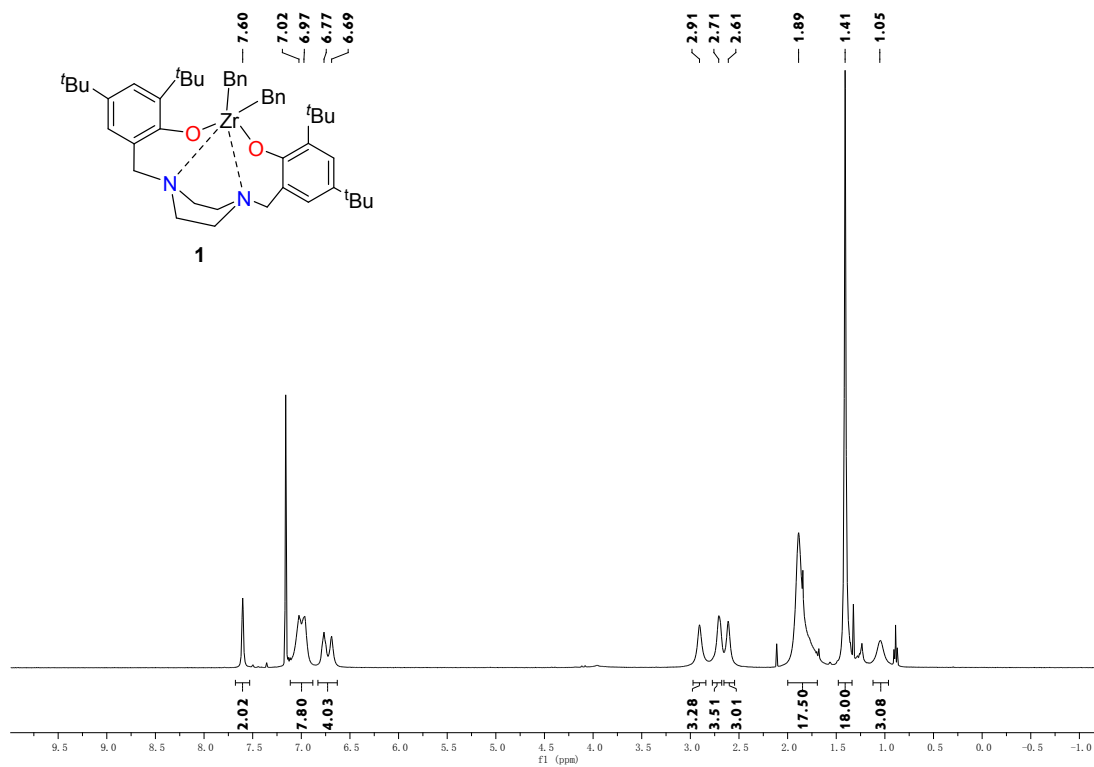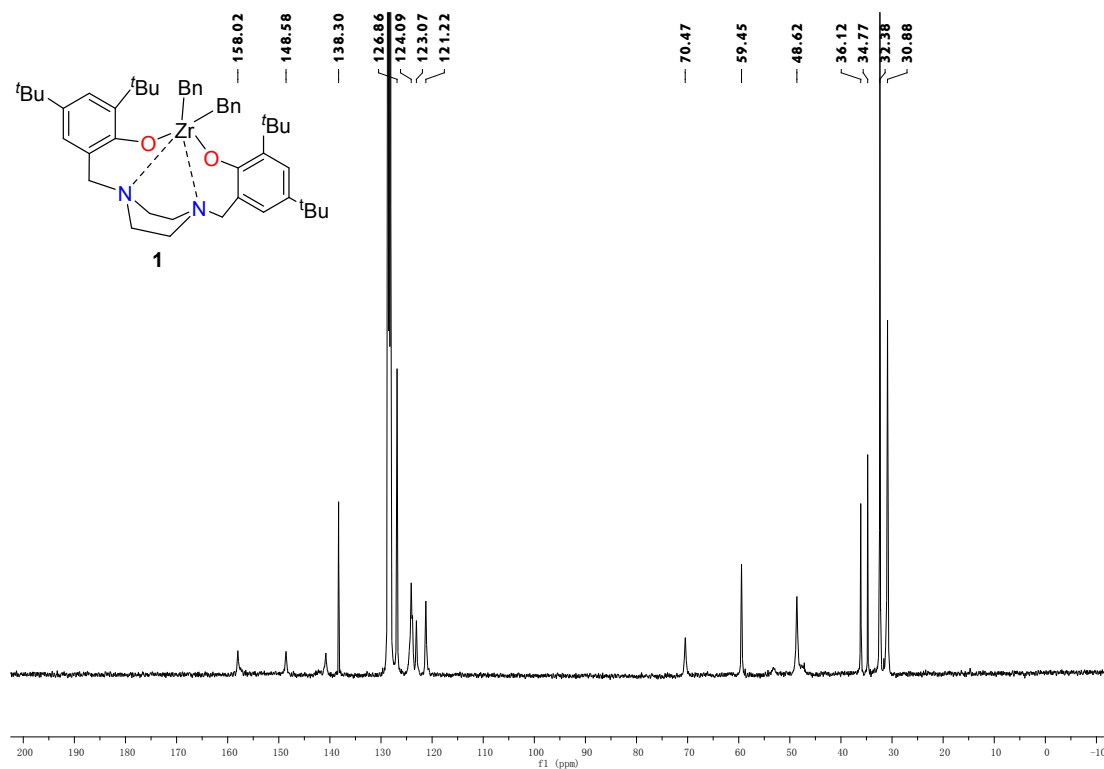

# $^1\text{H}$ and $^{13}\text{C}$ NMR spectra of complex 2

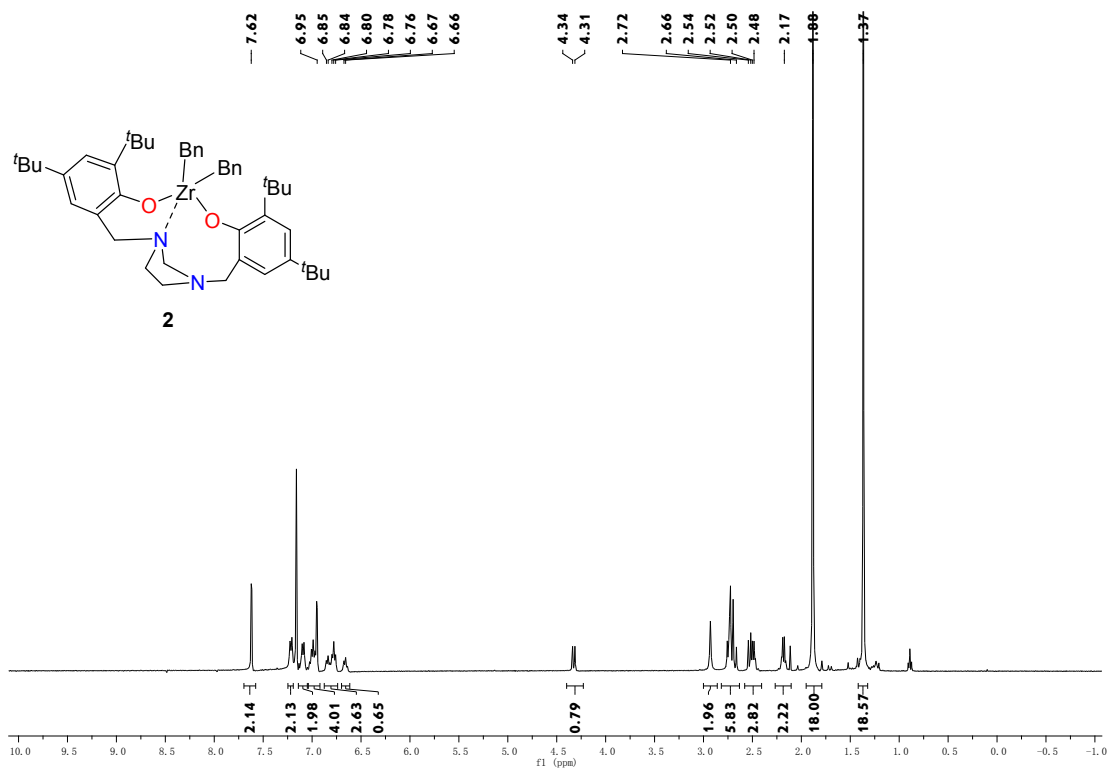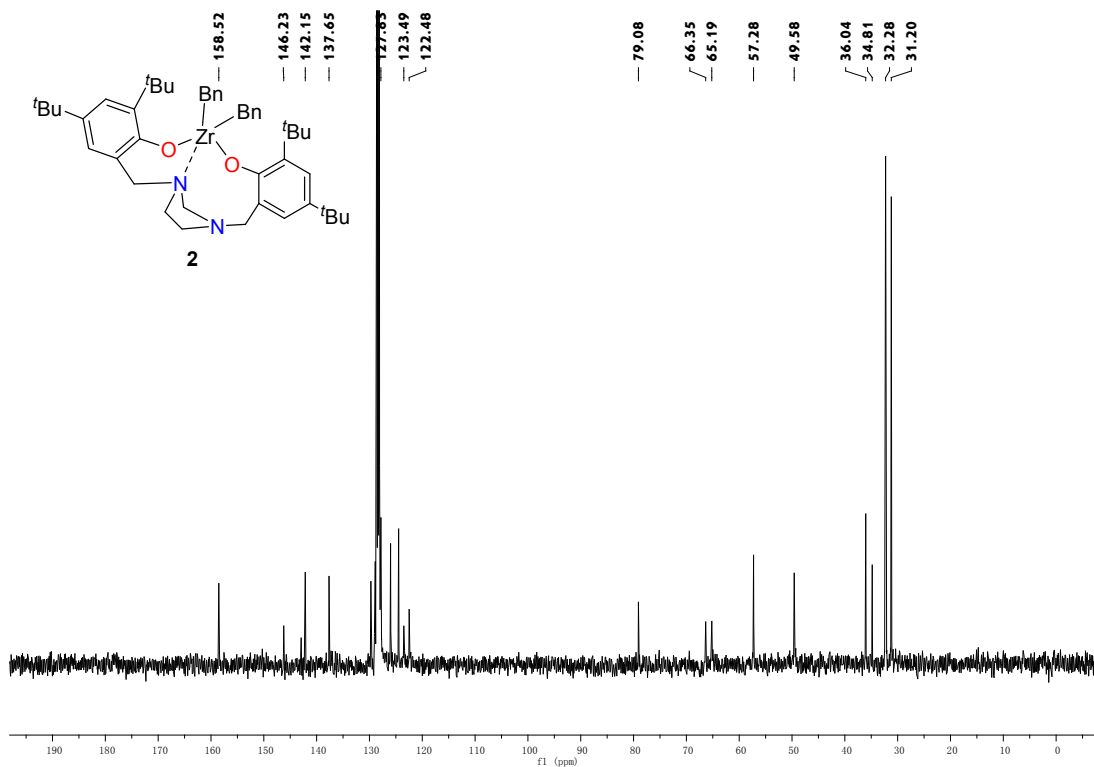

# <sup>1</sup>H and <sup>13</sup>C NMR spectra of cyclization products

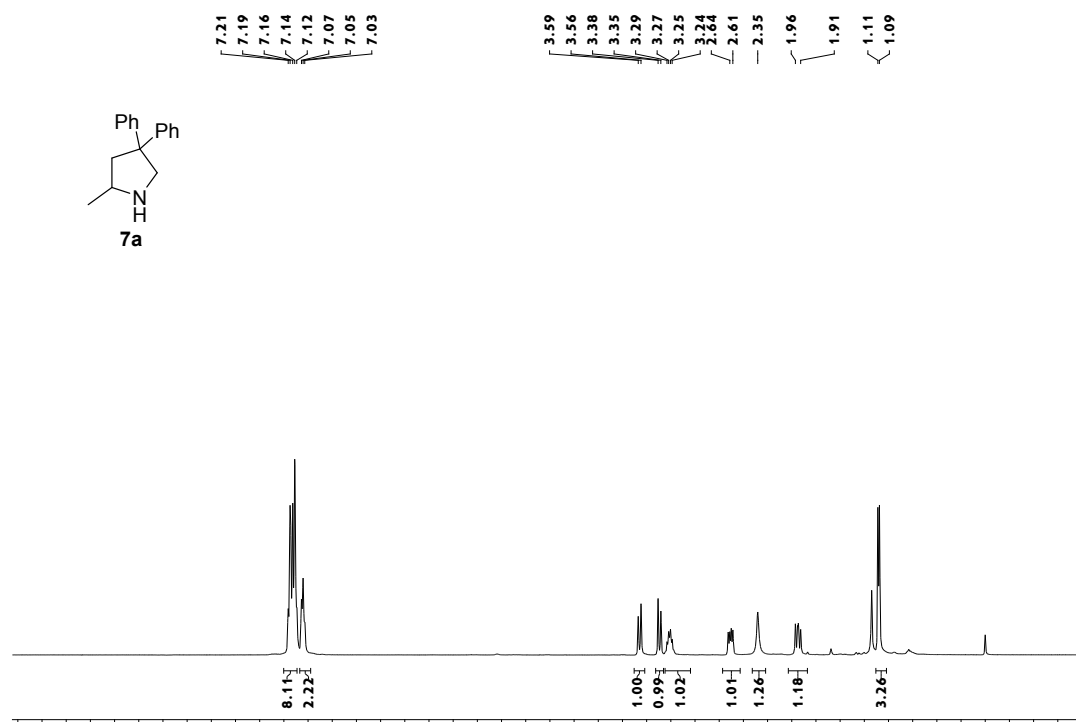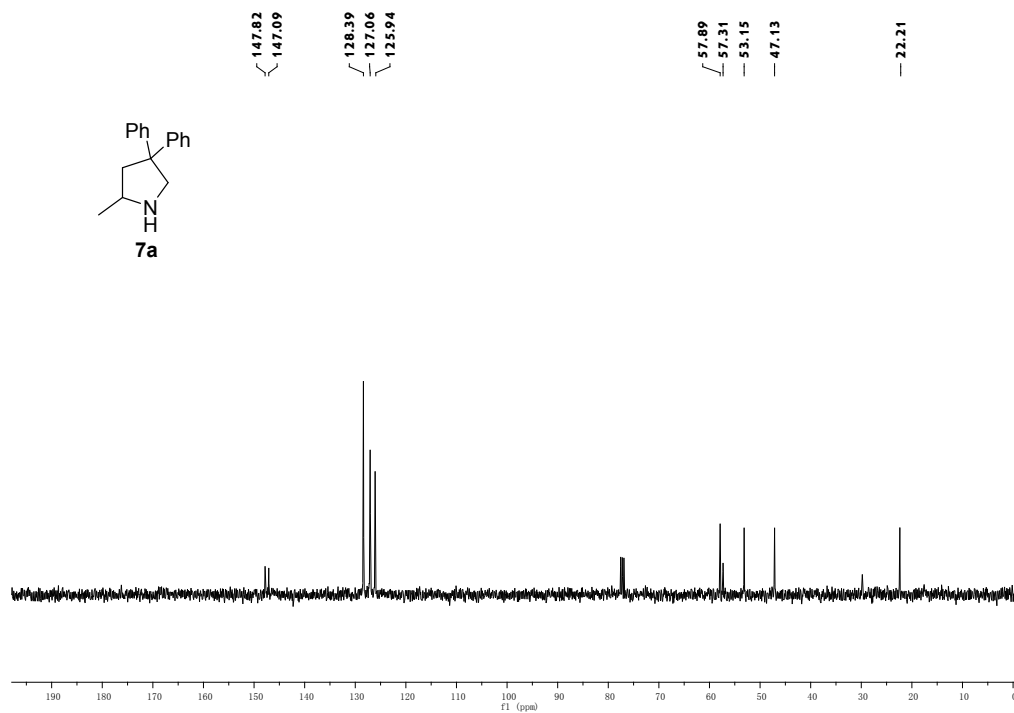

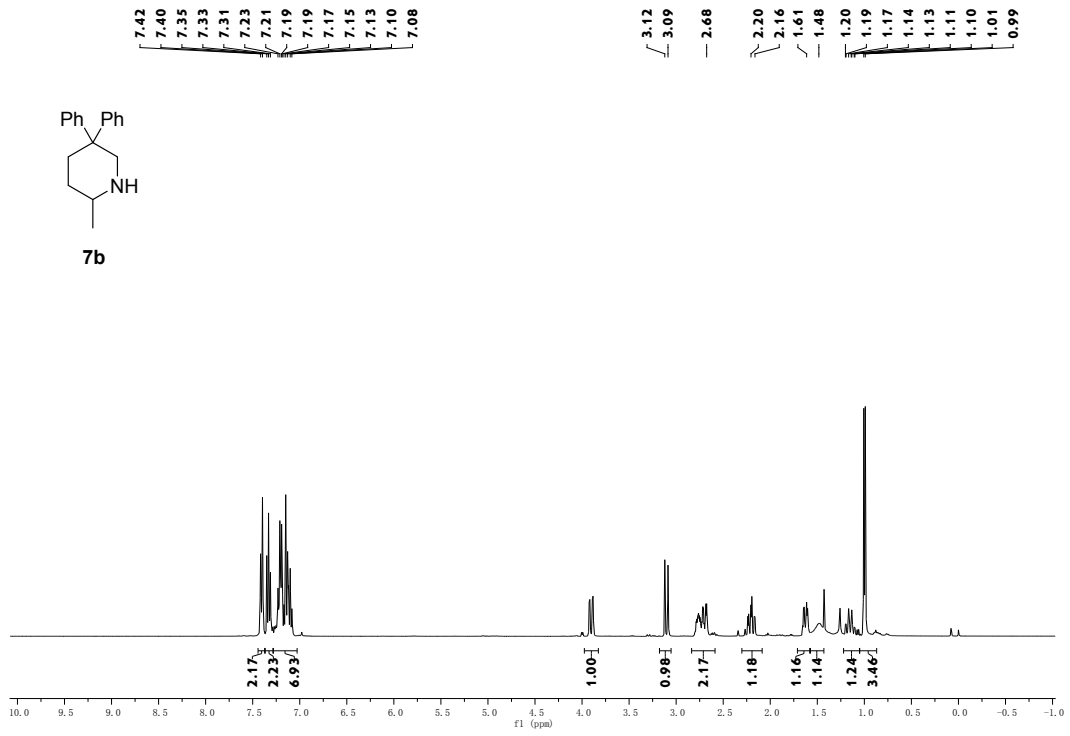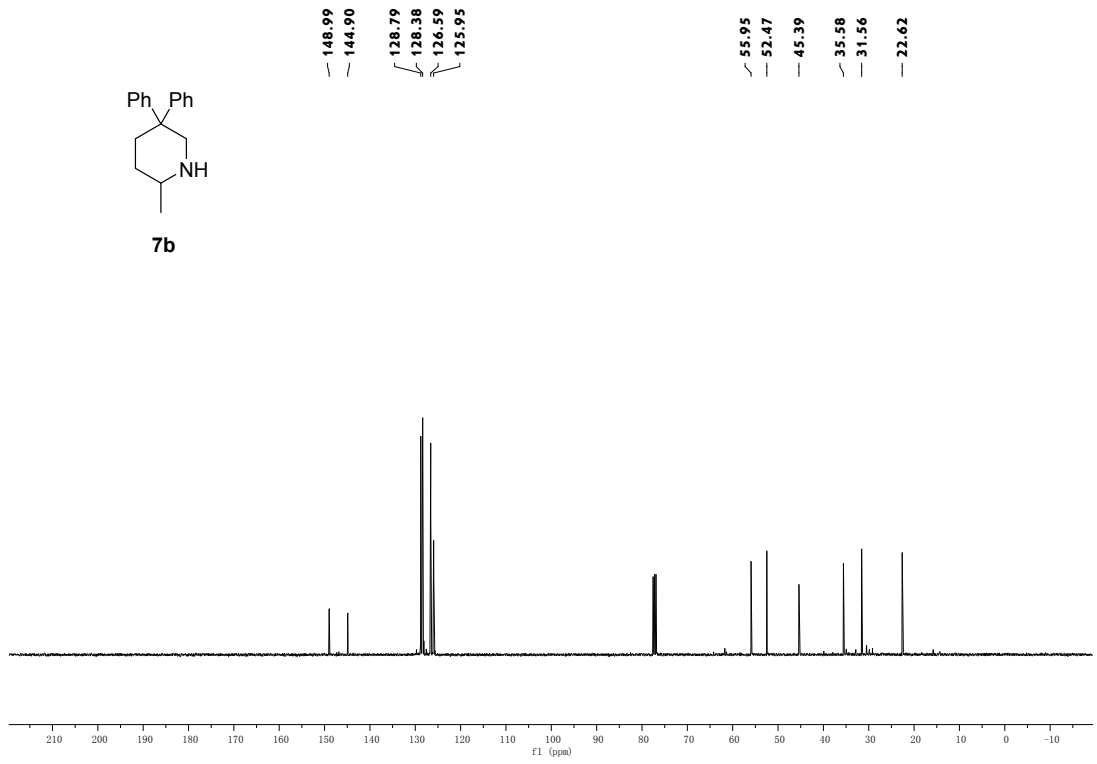

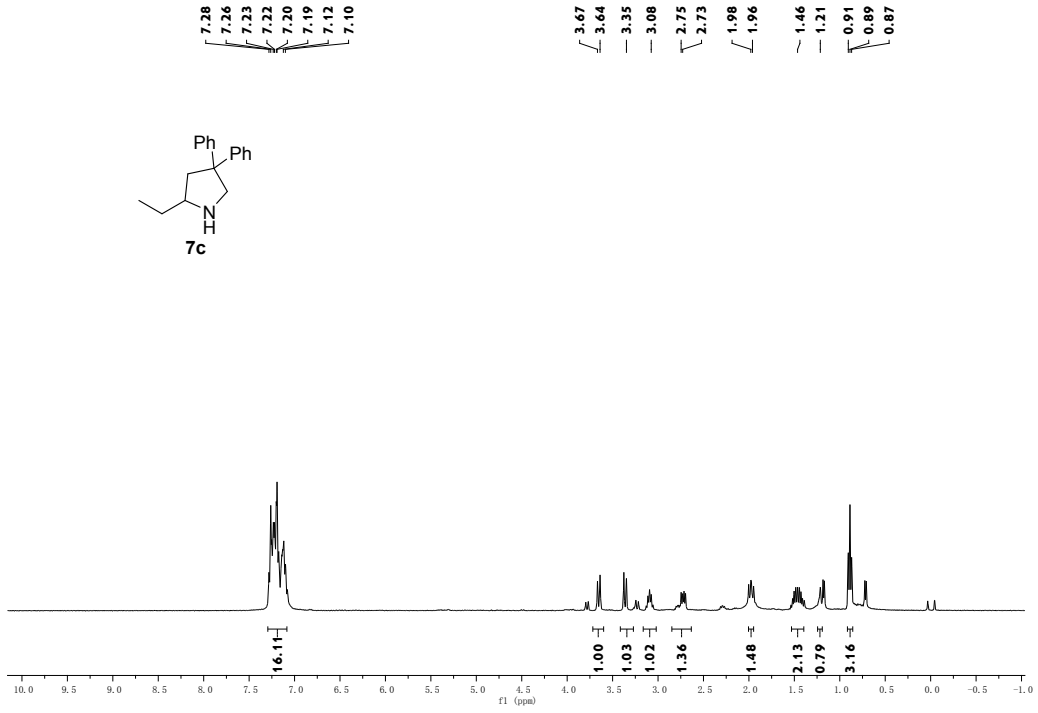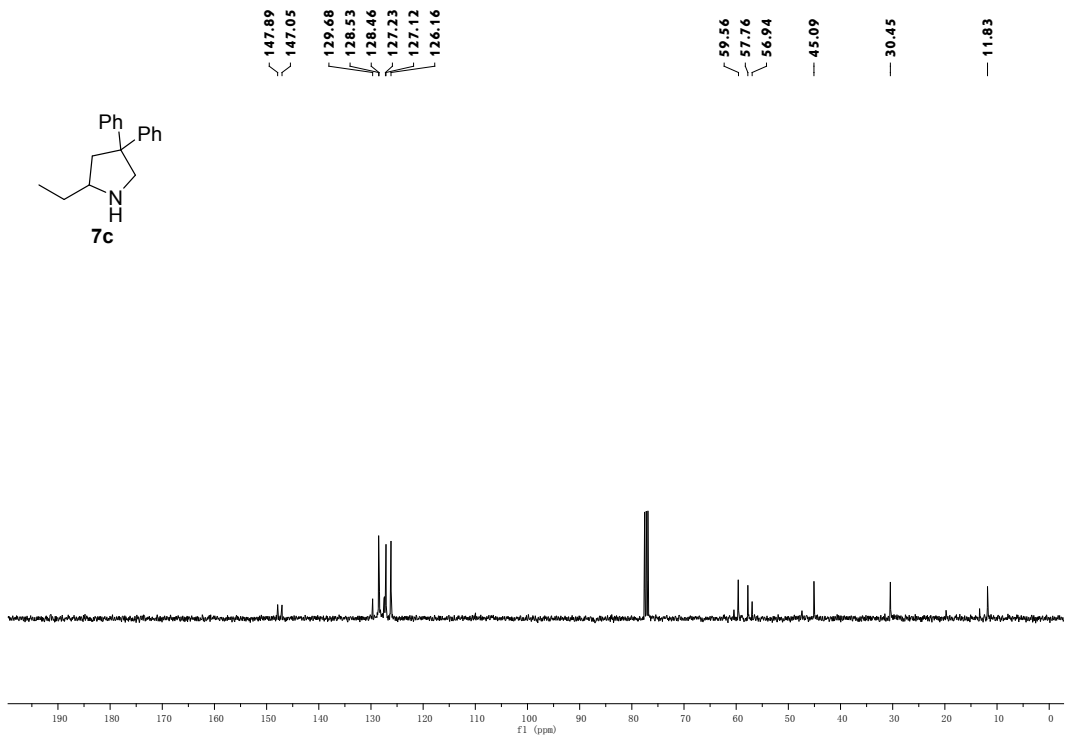

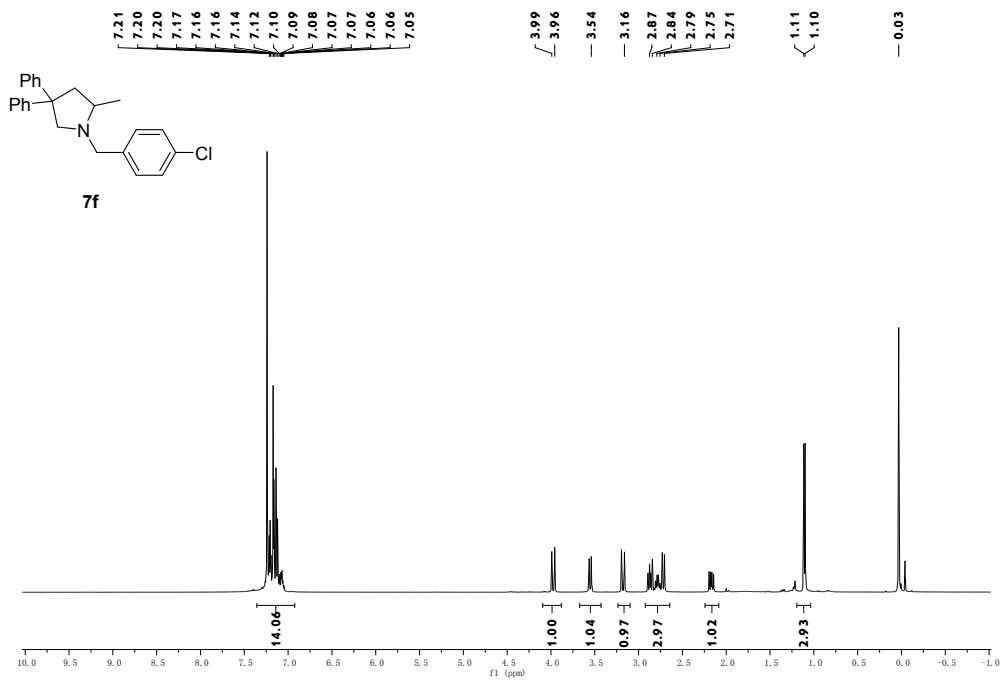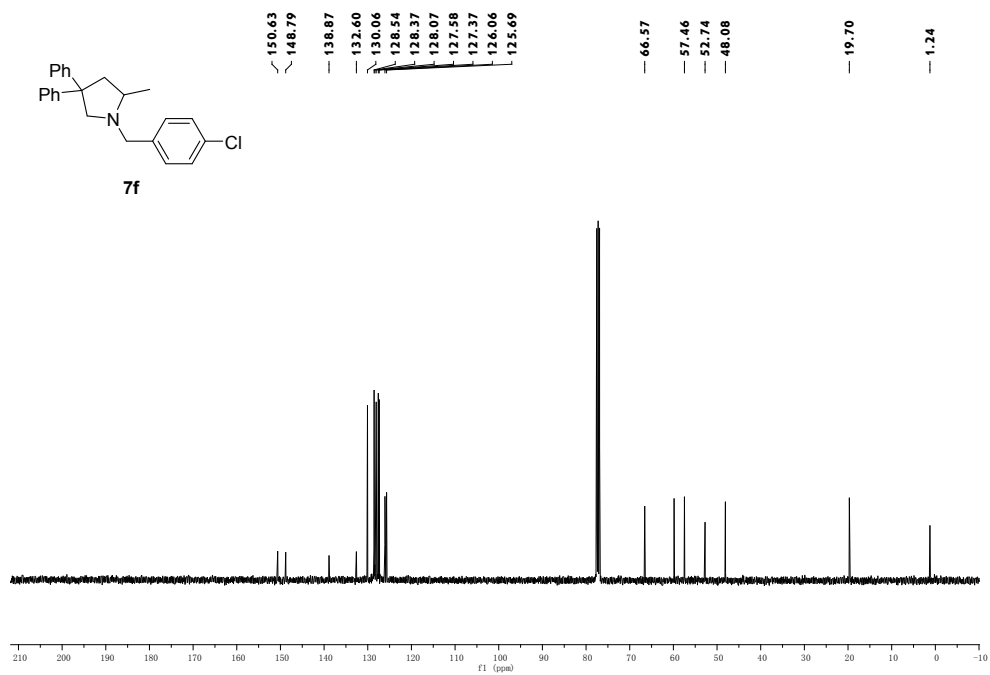

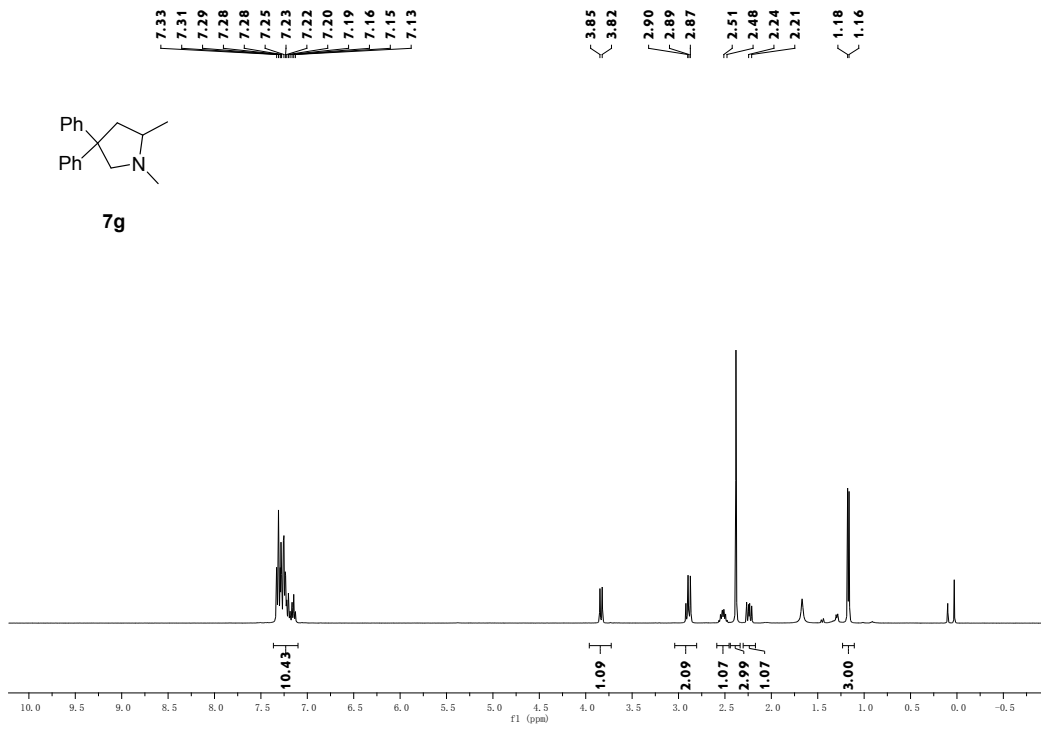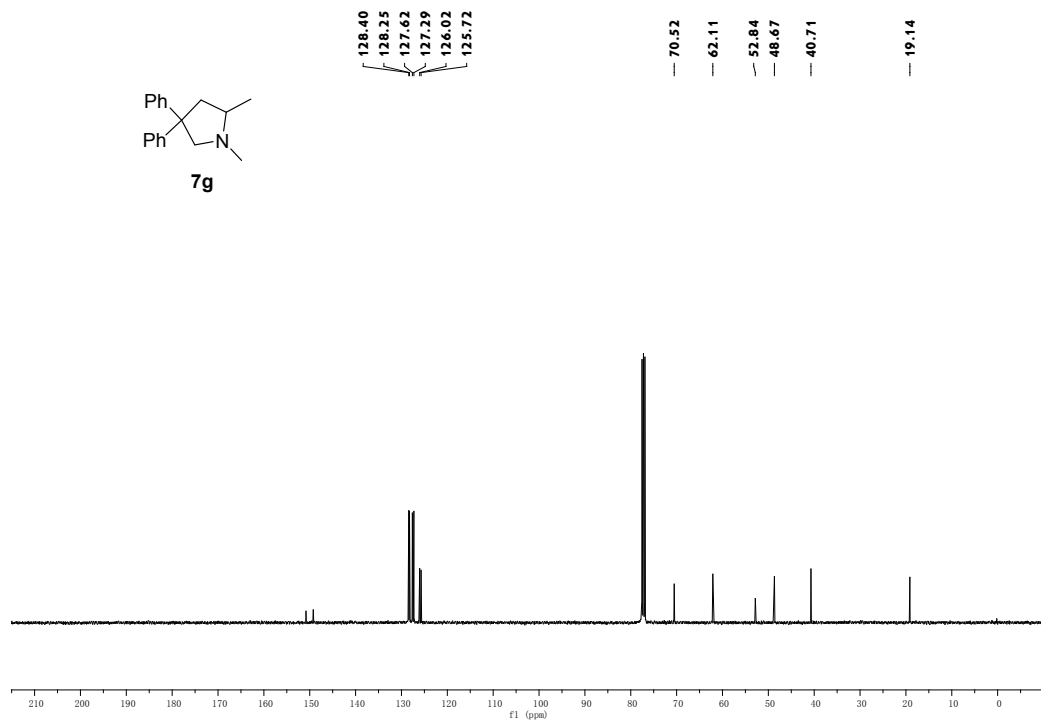



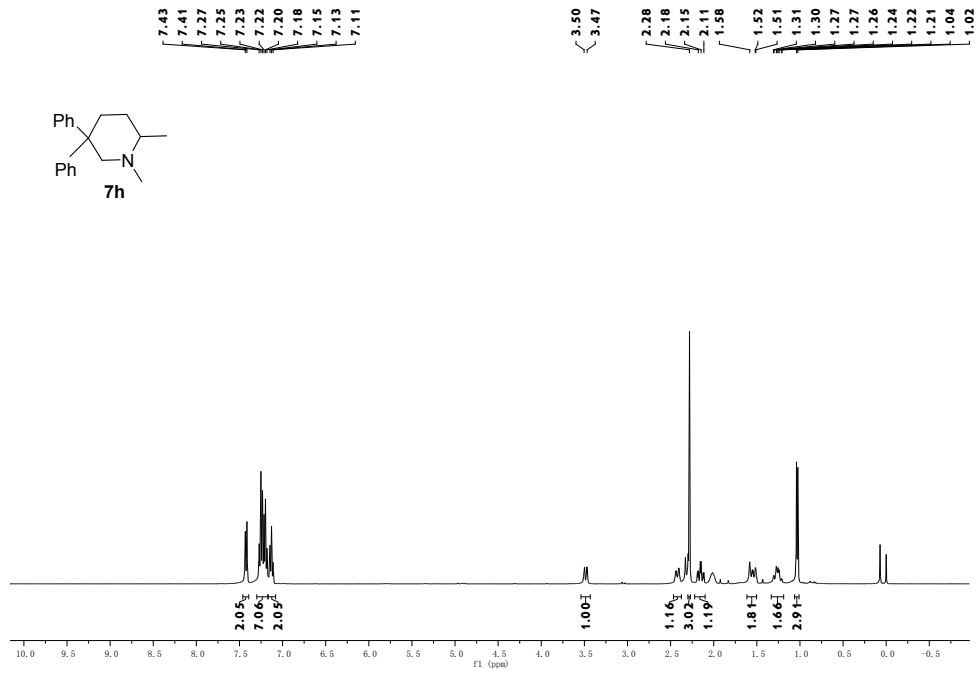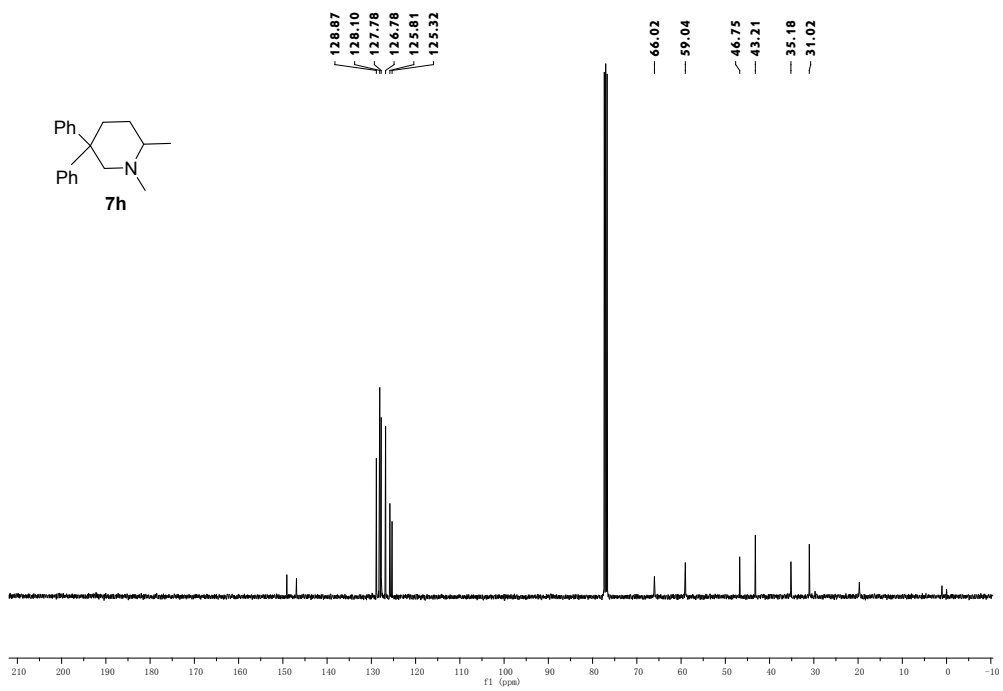

7.37  
7.35  
7.33  
7.31  
7.29  
7.26  
7.24  
7.23  
7.23  
7.21  
7.19  
7.18  
7.17  
7.16  
7.15  
7.13  
7.11  
7.09  
7.08

4.09  
4.06  
3.61  
3.22  
2.78  
2.22  
2.20  
2.19  
2.17  
1.16  
1.15

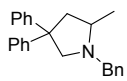

7i

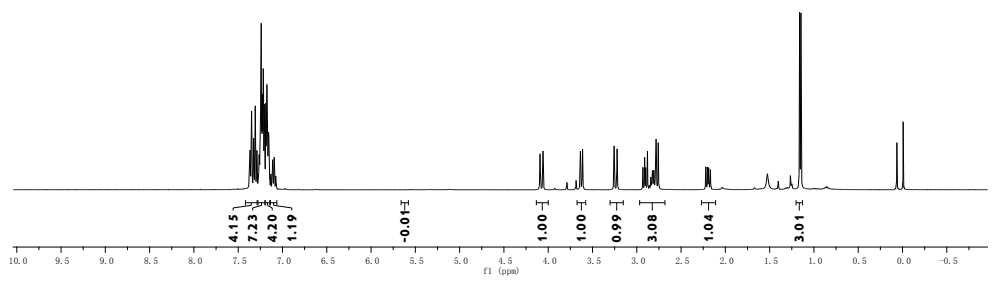

150.80  
148.93  
140.31  
128.79  
128.41  
128.33  
128.02  
127.64  
127.45  
126.97  
125.99  
125.60

66.65  
58.21  
52.74  
48.21  
19.73

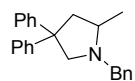

7i

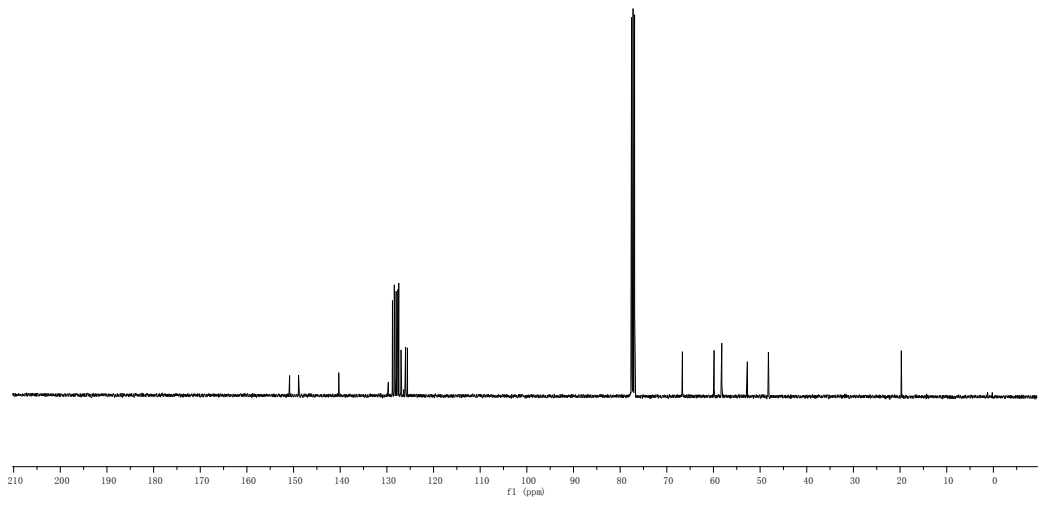

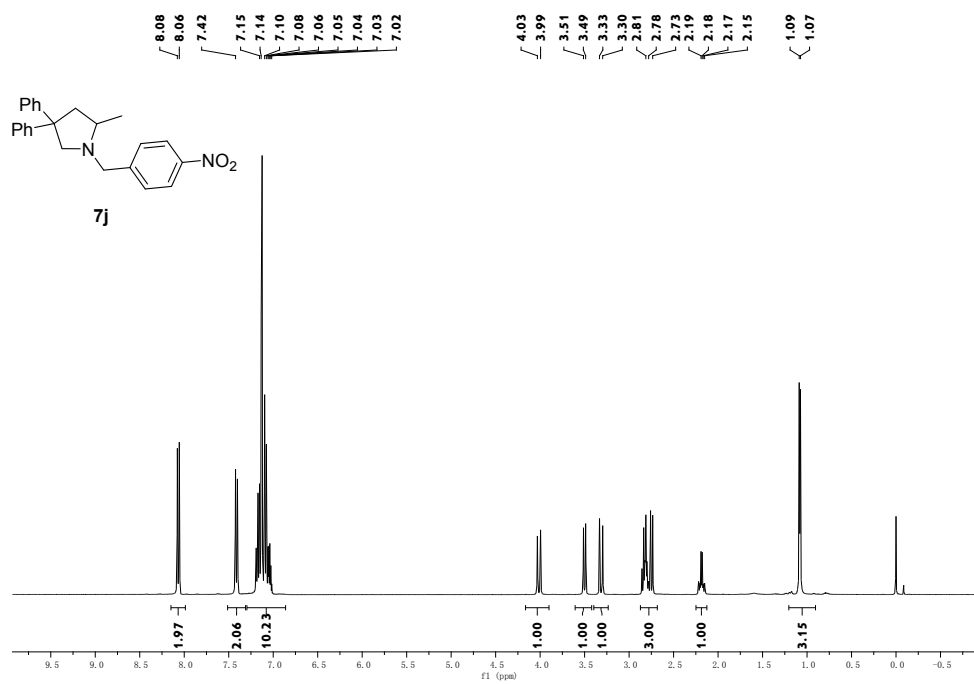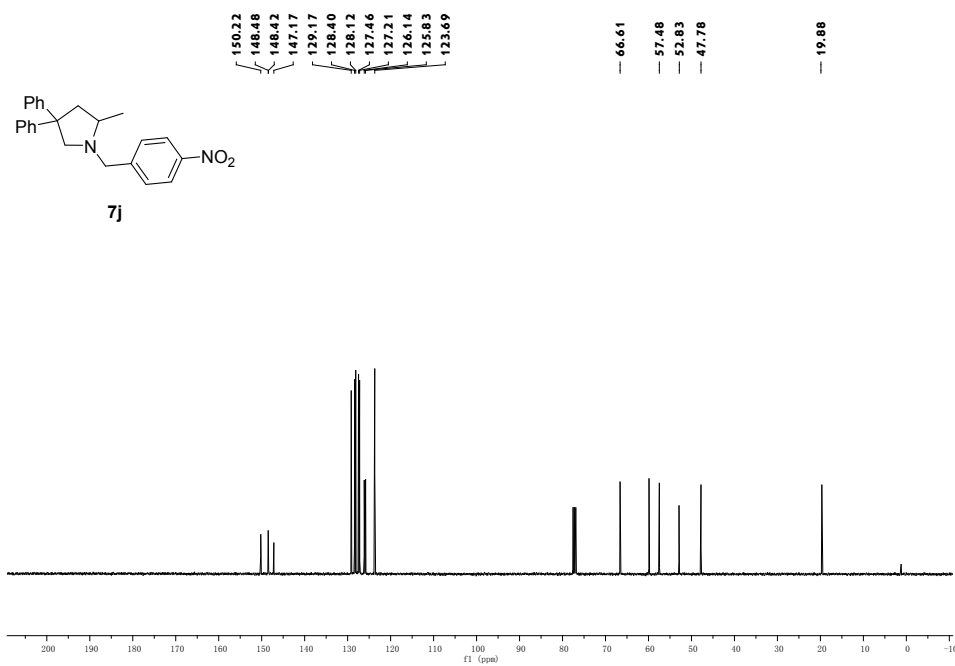

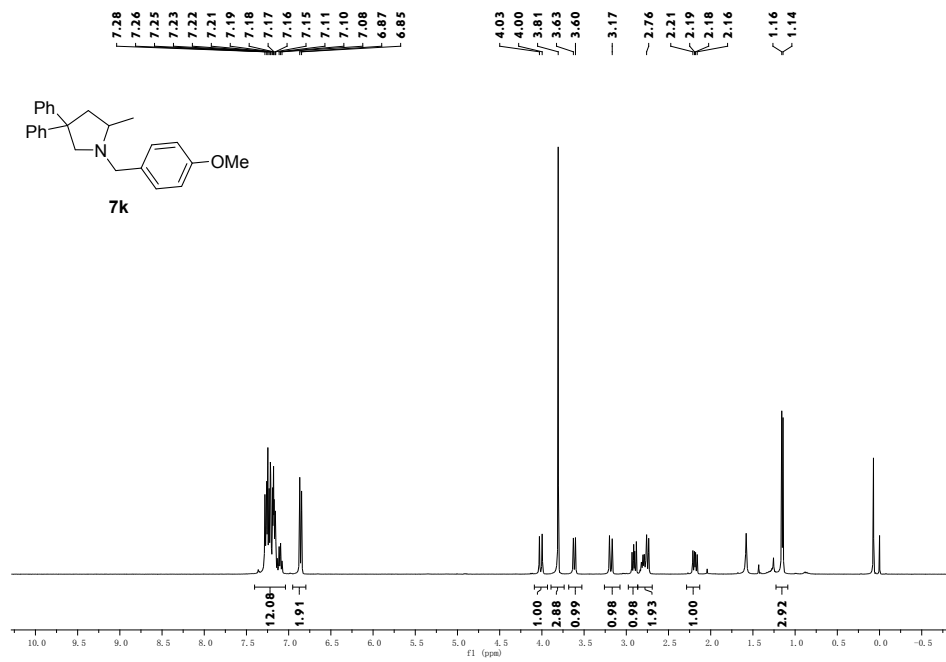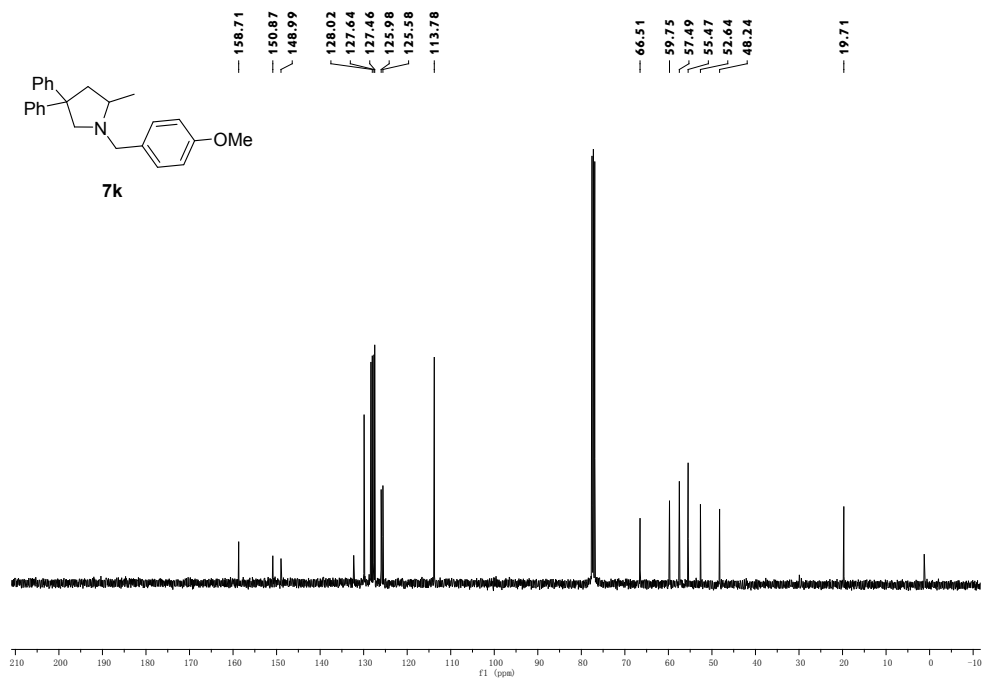

## <sup>1</sup>H NMR monitoring of reactions

<sup>1</sup>H NMR (400MHz, PhBr-d<sub>5</sub>), ferrocene as internal standard

Substrate **6d**: 0.3 mmol; catalyst: 5 mol% of complex **1** and [Ph<sub>3</sub>C][B(C<sub>6</sub>F<sub>5</sub>)<sub>4</sub>] (TB);

condition: 140 °C, 8 h

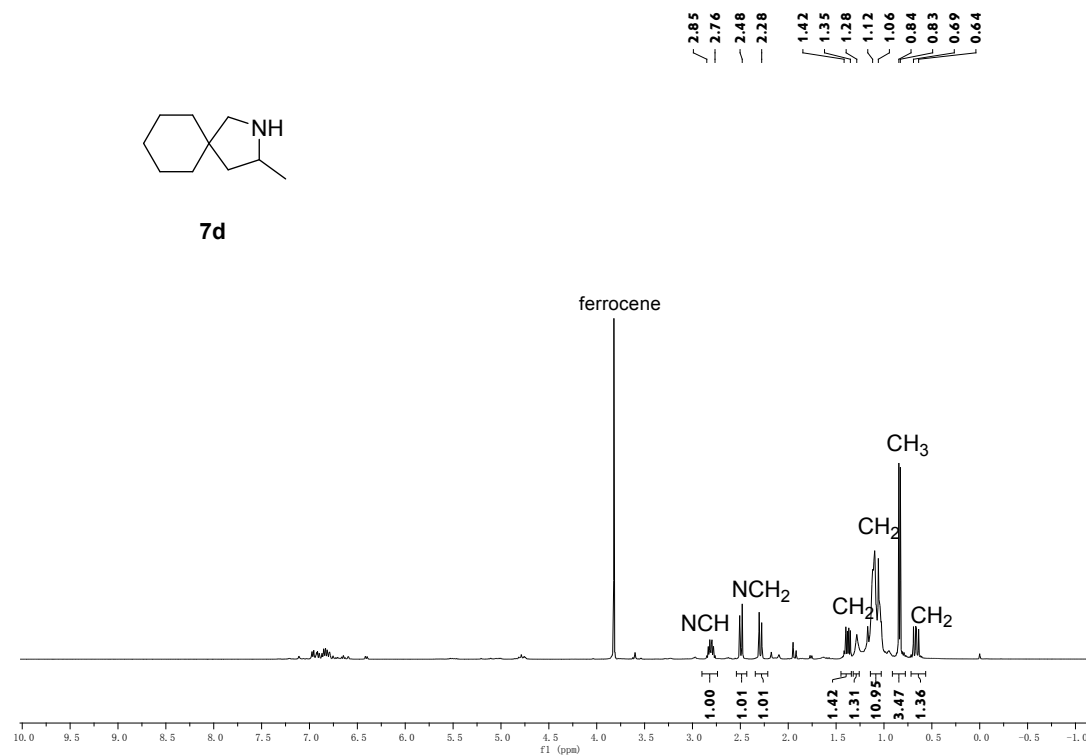

$^1\text{H}$  NMR (400MHz,  $\text{PhBr-d}_5$ ), ferrocene as internal standard

Substrate **6e**: 0.3 mmol, catalyst: 10 mol% of complex **1** and  $[\text{Ph}_3\text{C}][\text{B}(\text{C}_6\text{F}_5)_4]$  (TB),

Temperature: 140  $^\circ\text{C}$

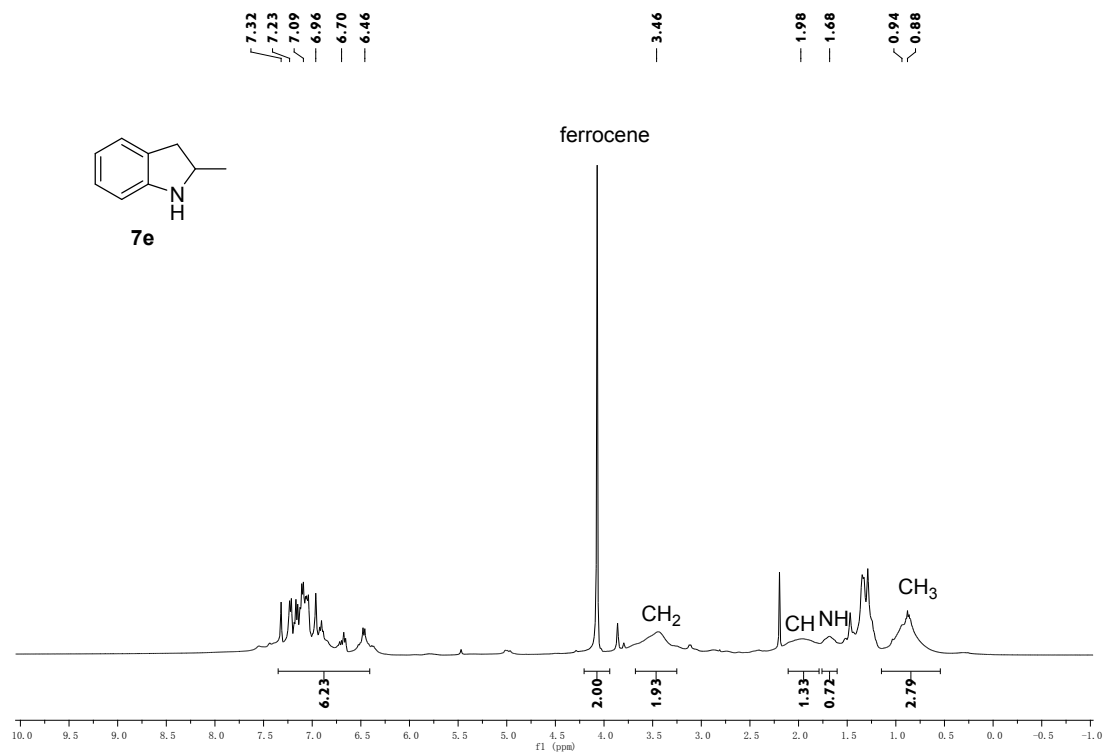

$^1\text{H}$  NMR (400MHz,  $\text{PhCl-d}_5$ ), ferrocene as internal standard

Substrate **6i**: 0.3 mmol; catalyst: 5 mol% of complex **1** and  $[\text{Ph}_3\text{C}][\text{B}(\text{C}_6\text{F}_5)_4]$  (TB);

condition: 140 °C, 48 h

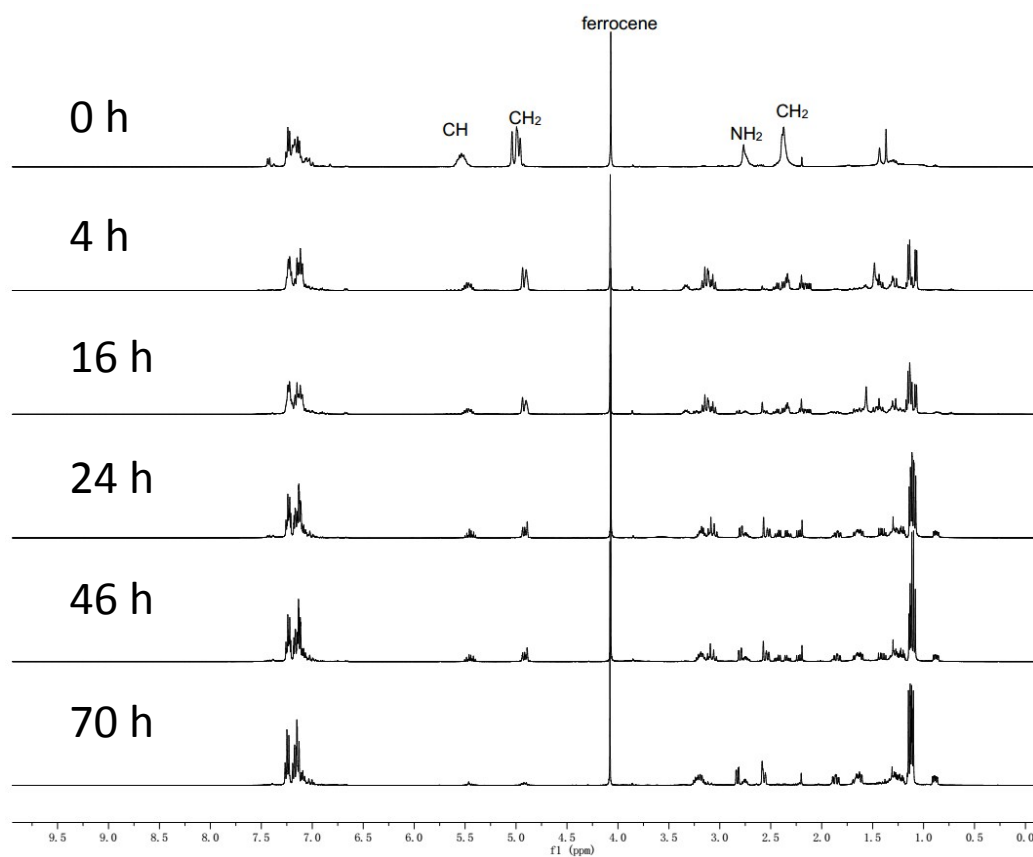

$^1\text{H}$  NMR (400MHz,  $\text{PhCl-d}_5$ ), ferrocene as internal standard

Substrate **6m**: 0.3 mmol; catalyst: 10 mol% of complex **1** and  $[\text{Ph}_3\text{C}][\text{B}(\text{C}_6\text{F}_5)_4]$  (TB);

condition: 140  $^\circ\text{C}$ , 96 h

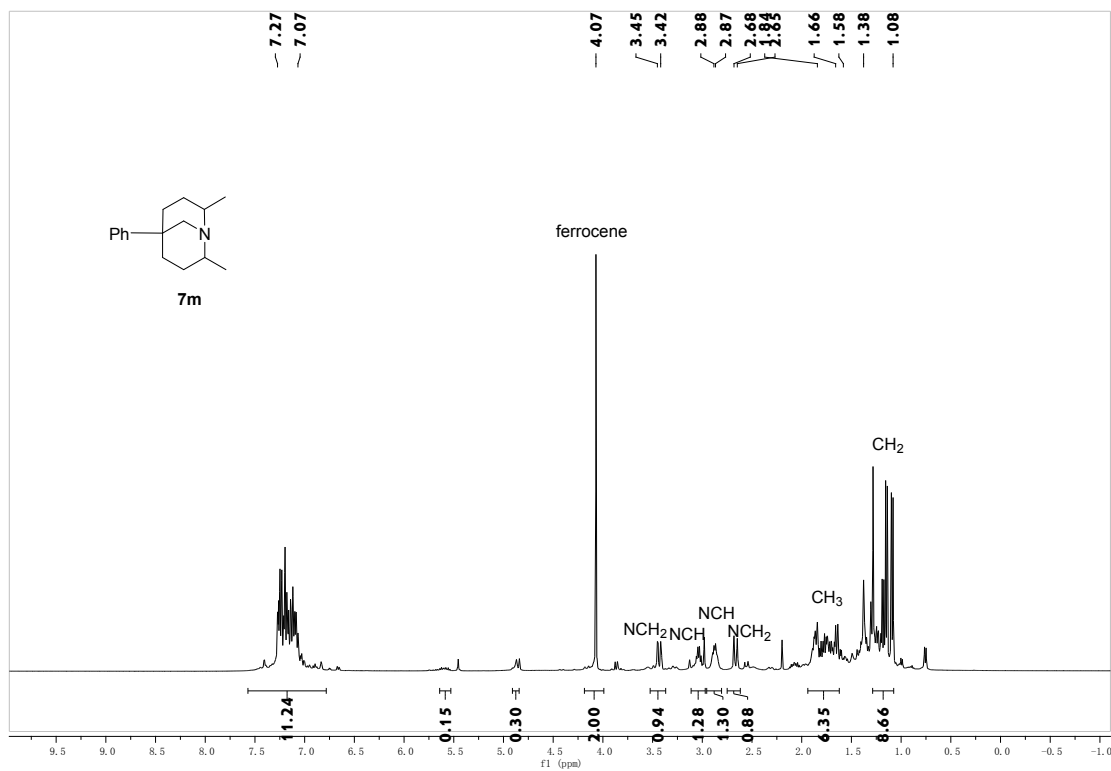



# $^1\text{H}$ and $^{13}\text{C}$ NMR spectra of complex 1 + TB

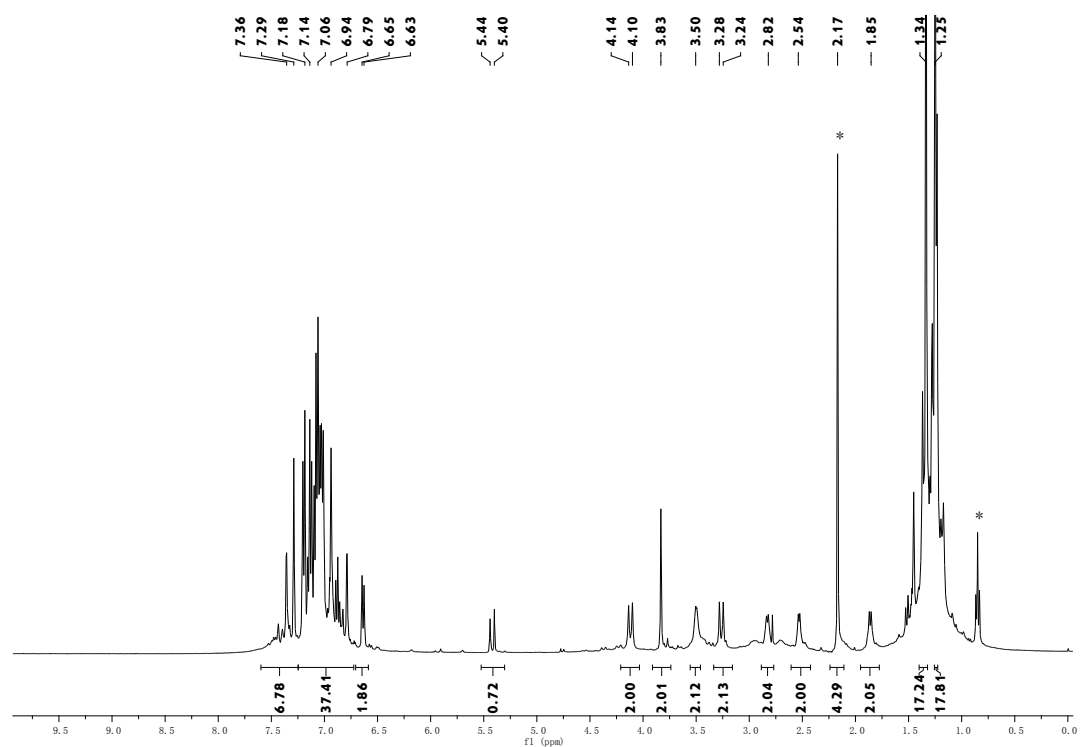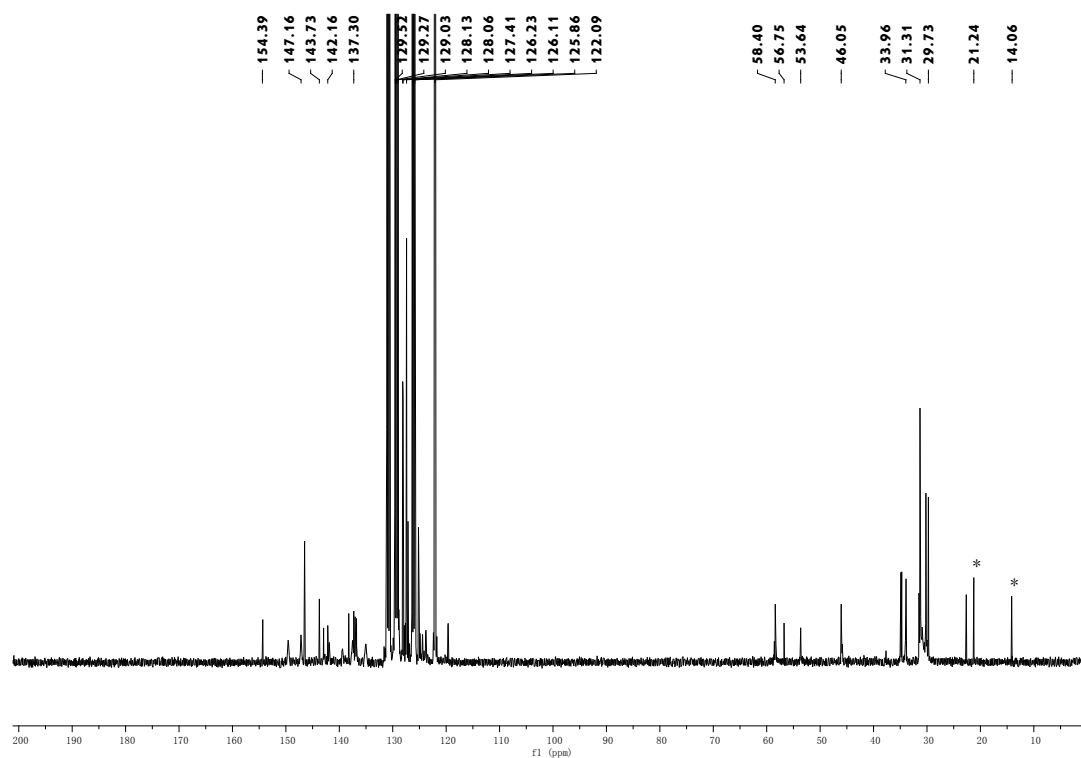

Signals marked with asterisks correspond to solvent (toluene and hexane, respectively).

Table S1. Crystallographic data for complexes **1** and **2**

|                                                       | <b>1</b>                                                         | <b>2</b>                                                         |
|-------------------------------------------------------|------------------------------------------------------------------|------------------------------------------------------------------|
| Empirical formula                                     | C <sub>48</sub> H <sub>66</sub> N <sub>2</sub> O <sub>2</sub> Zr | C <sub>47</sub> H <sub>62</sub> N <sub>2</sub> O <sub>2</sub> Zr |
| Fw                                                    | 794.25                                                           | 778.21                                                           |
| Temperature (K)                                       | 293(2)                                                           | 223(2)                                                           |
| $\lambda$ (Mo K $\alpha$ ) (Å)                        | 0.71073                                                          | 0.71073                                                          |
| Cryst. Syst.                                          | orthorhombic                                                     | orthorhombic                                                     |
| color                                                 | colourless                                                       | yellow                                                           |
| Cryst size (mm)                                       | 0.40 × 0.40 × 0.40 mm                                            | 0.40 × 0.20 × 0.20 mm                                            |
| Space group                                           | Pnna                                                             | P 2 <sub>1</sub> 2 <sub>1</sub> 2 <sub>1</sub>                   |
| a (Å)                                                 | 12.6905(4)                                                       | 11.480(2)                                                        |
| b (Å)                                                 | 29.8425(13)                                                      | 14.798(3)                                                        |
| c (Å)                                                 | 12.0229(5)                                                       | 25.295(5)                                                        |
| $\alpha$ (deg)                                        | 90                                                               | 90                                                               |
| $\beta$ (deg)                                         | 90                                                               | 90                                                               |
| $\gamma$ (deg)                                        | 90                                                               | 90                                                               |
| V (Å <sup>3</sup> )                                   | 4553.3(3)                                                        | 4297.1(15)                                                       |
| Z                                                     | 4                                                                | 4                                                                |
| D <sub>calc.</sub> (g cm <sup>-3</sup> )              | 1.159                                                            | 1.203                                                            |
| $\mu$ (mm <sup>-1</sup> )                             | 0.278                                                            | 0.294                                                            |
| F(000)                                                | 1696                                                             | 1656                                                             |
| $\theta$ Range (°)                                    | 3.11 to 25                                                       | 1.59 to 26.23                                                    |
| No. of reflns collected                               | 13016                                                            | 12546                                                            |
| No. of reflns unique, R <sub>int</sub>                | 4014, 0.0631                                                     | 7290, 0.0360                                                     |
| Max, min transm                                       | 1.00000, 0.61724                                                 | 0.9436, 0.8916                                                   |
| No. of variables                                      | 246                                                              | 497                                                              |
| R <sub>1</sub> , wR <sub>2</sub> [I > 2 $\sigma$ (I)] | 0.0960, 0.1831                                                   | 0.0475, 0.1213                                                   |
| R <sub>1</sub> , wR <sub>2</sub> (all data)           | 0.1392, 0.1934                                                   | 0.0523, 0.1262                                                   |
| Goodness-of-fit on F <sup>2</sup>                     | 1.102                                                            | 1.028                                                            |
| Largest diff. peak, hole/e Å <sup>-3</sup>            | 0.906, -1.867                                                    | 1.073, -0.485                                                    |
